# Supplementary material for: The Potential Role of Hydrogen Sulfide in the Regulation of Cerebrovascular Tone
Source: Biomolecules. 2020 Dec 16;10(12):1685. doi: 10.3390/biom10121685 (PMC7766080; doi:10.3390/biom10121685)
Supplement: Supplementary file 1 [file biomolecules-10-01685-s001.xlsx]

## Sheet: H2S DONORS
	Study type	Method	Animal	Vessel or cell type	H2S donor, concentration and administration	Examination or study setup	Outcome	Ref
	in vitro	cell culture	mouse	mouse brain endothelial cells(MBECs) and astrocytes type I. clone	NaHS, 5 µM for 0-20-60-180 min	NaHS treatment during oxygen-glucose deprivation	VEGF, Ang-1 expression ­	[1]
	in vitro	wound healing and cell migration assay	mouse	MBECs	NaHS, 5 µM for 3 hr	cells incubated with NaHS and the PI3K inhibitor LY294002	increased endothelial cell migration and tube formation	[1]
	in vitro	Western blot and immunofluorescent staining and TUNEL assay on brain sections	Sprague-Dawley rat	middle cerebral artery	NaHS, 5mg/kg ip.	middle cerebral artrery occlusion with 120 min ischemia followed by reperfusion. NaHS treatment from the 3rd to the 14th day after reperfusion.	Augmented angiogenesis in the peri-infarct area; improved functional outcomes; phosphorylation of AKT and ERK ­; VEGF, Ang-1 expression ­	[1]
	in vitro	patch clamp	rat	single myocites from isolated rat cerebral artery	NaHS 1-10 mM	effect of NaHS on L-type Ca-current	NaHS concentration-dependently inhibited L-type Ca-currents	[2]
	in vitro	patch clamp	newborn piglet	isolated arteriole smooth muscle cells	Na2S 10 µM	effect of Na2S on KCa currents	H2S increased KCa current frequency, but did not affect the amplitude; it has no effect directly on the KCa channels but only on Ca2+ sparks.	[3]
	in vitro	patch clamp	newborn pigs	pial arterioles	Na2S 10 µM; NaHS 20 µM	measurement of K-currents after pinacidil, Na2S, or NaHS treatment, and the effect of glibenclamide (KATP inhibitor)	pinacidil, Na2S and NaHS also induced K-currents through KATP channels. Glibenclamide fully reversed the effect of pinacidil, and partially reversed the effect of H2S-donors.	[4]
	in vitro	tissue samples after experimental subarachnoideal hemorrhage (SAH)	Wistar rat	basilar arteries	NaHS 0.18 mmol/kg ip.	Effect of NaHS on luminal diameter and wall thickness after	NaHS had a vasodilatory effect: the luminal diameter increased both in the control and in the SAH group; wall thickness was decreased in both groups.	[5]
	in vitro	tissue samples after experimental subarachnoideal hemorrhage (SAH)	Wistar rat	basilar arteries	NaHS 0.18 mmol/kg ip.	Effect of NaHS on CBS and CSE expression	NaHS increased CBS expression in both the control and SAH groups; CSE expression did not change between groups	[5]
	in vitro	cerebellar slices	mouse (WT and CBS-KO)	vermis arterioles	NaHS 30 µM	treatment on the cerebellar slices either with the HO-inhibitor ZnPP or NaHS; effect of glibenclamide treatment	ZnPP elicited vasorelaxation through blockade of CO, which is comparable to the effect of NaHS in WT animals; in CBS-KO mice, ZnPP treatment did not resulted in vasoliation, but the effect of NaHS was more pronounced; glibenclamide abolished the effect of NaHS	[6]
	in vitro	cAMP level immunoassay and adenylyl cyclase activity assay	human	human brain vascular smooth muscle cells (HBVSMCs)	NaHS 10-4 M	measurement of cAMP level after NaHS, isoprenaline and forskolin treatment	NaHS attenuates the elevated cAMP levels after isoprenaline treatment; also attenuates the enhanced adenylyl cyclase activity after forskolin	[7]
	ex vivo	wire myograph	Sprague-Dawley rats	basilar artery	NaHS, Na2S, GYY4137, 10-7-10-3.5 M	effect of NaHS,Na2S, GYY4137 on basilar artery segments	NaHS induced concentration-dependent vasoconstriction; the effect decreased at 10-3.5 M concentration. Effectivity: NaHS>Na2S>GYY4137	[7]
	ex vivo	wire myograph	Sprague-Dawley rats	basilar artery	NaHS 10-7-10-3.5 M	NaHS, given at the same time /after isoprenaline or forskolin on basilar artery segments	isoprenaline or forskolin given after NaHS: vasocontriction was augmented; NaHS and isoprenaline/forskolin given together: the vasorelaxant effect of isoprenaline decreased	[7]
	ex vivo	wire myograph	Sprague-Dawley rats	basilar artery	NaHS 10-7-10-3.5 M	NaHS given with 8B-cAMP (analog of cAMP) and Bay K-8644 (selective L-type Ca-channel blocker) on basilar artery segments	In the presence of 8B-cAMP, the vasocontriction was diminished; Bay K-8644 had no effect	[7]
	ex vivo	wire myograph	Sprague-Dawley rats	basilar artery	NaHS 10-7-10-3.5 M	NaHS treatment on endothelium-denuded segments or in the presence of L-NAME	Endothelium removal or L-NAME enhanced the vasoconstriction	[7]
	ex vivo	wire myograph	Sprague-Dawley rat	middle cerebral artery	L-cysteine 0.1-10 mM/l	effect of L-cysteine on the vascular tone	L-cysteine dilated the artery segments	[2]
	ex vivo	wire myograph	Sprague-Dawley rat	middle cerebral artery	NaHS 0.5-1-10 mM	Effect of NaHS on CaCl2-induced contraction	NaHS inhibited the CaCl2-induced contractions	[2]
	ex vivo	wire myograph	WT mice	basilar arteries	NaHS 10-6-10-3 M	Effect of NaHS on vascular tone given with LY27632 ROCK inhibitor	H2S induced concentration-dependent relaxation; it was attenuated by the LY27632	[8]
	ex vivo	wire myograph	Sprague-Dawley rat	middle cerebral artery	NaHS 0.03-10 mM	NaHS treatment with K-channel blockers (glibenclamide, TEA, 4-aminopyridine, BaCl2, ouabain), with nifedipine, L-NAME or with indomethacin	NaHS caused concentration-dependent relaxation, which was unaffected by the K-channel blockers, L-NAME or indomethacin, but its effect was decreased by nifedipine	[2]
	ex vivo	wire myograph	Sprague-Dawley rats (WT and STZ-induced diabetic)	middle cerebral artery	L-cysteine (10 µM/L-100 mmol/L)	measurements with L-cysteine treatment	L-cysteine induced vasorelaxation in both groups, but the effect was enhanced in the diabetic group	[9]
	ex vivo	wire myograph	Sprague-Dawley rats (WT and STZ-induced diabetic)	middle cerebral artery	NaHS (10 µM/L-3 mmol/L)	measurements with NaHS using KCl, DIDS, nifedipine	NaHS induced equal vasorelaxation both in the diabetic and the normal group; the contribution of Cl- channels were less in the diabetic group	[9]
	ex vivo	wire myography	Sprague-Dawley rat	middle cerebral artrery	NaHS 0.1-3.0 mM to bath solution	measurements with NaHS on intact and on endothelium-denuded vessel segments treated with nifedipine, KATP, KCa, KV, Kir blockers	NaHS induced concentration-dependent relaxation unaffected by endothelium removal; nifedipine and high K+ content decreased the relaxing effect, but blockers of KATP, KCa, KV, Kir had no effect.	[10]
	ex vivo	wire myograph	Sprague-Dawley rat	middle cerebral artrery	NaHS 0.1-3.0 mM to bath solution	measurements with NaHS using DIDS	DIDS caused significant rightward shift in the concentration-response curve; but not by inhibition of Cl- channels or the Cl-/HCO3- exchange	[10]
	ex vivo	pressure myograph	Sprague-Dawley rat	middle cerebral artery	NaHS 0.1-10 mM	effect of NaHS against myogenic tone	NaHS reduced myogenic tone	[2]
	ex vivo	pressure myograph	newborn piglet	pressurized cerebral arterioles	Na2S 10 µM	effect of iberiotoxin on Na2S induced hyperpolarization	H2S induces iberiotoxin-sensitive hyperpolarization	[3]
	ex vivo	pressure myograph	newborn piglet	cerebral arterioles	Na2S 10 µM	effect of Na2S alone/with iberiotoxin or ryanodine	H2S induced dilatation; it was partially reversed by iberiotoxine and also partially reversed by ryanodine	[3]
	ex vivo	pressure myograph	newborn pigs	pial arterioles	Na2S 0.1-1000 µM	measurements of vascular response to Na2S and after glibenclamide	H2S induced vasodilatation, which was attenuated by glibenclamide	[4]
	ex vivo	pressure myograph	newborn piglet	cerebral arterioles	Na2S 10 µM	effect of Na2S alone/with iberiotoxin or ryanodine	H2S induced dilatation; it was partially reversed by iberiotoxine and also partially reversed by ryanodine	[3]
	ex vivo	pressure myograph	wild-type and SUR2-null mice	posterior cerebral and cerebellar arteries	Na2S 5 µM	measurements of vascular response to Na2S and pinacidil in WT and SUR2-null animals	Na2S- and pinacidil-induced vasodilation was attenuated in the SUR2-null mice	[4]
	ex vivo	confocal imaging	Sprague-Dawley rat	middle cerebral artery	NaHS 0.1-0.5-1 mM	effect of NaHS on [Ca2+]i level	NaHS decreased [Ca2+]i	[2]
	ex vivo	confocal imaging	newborn piglet	cerebral arterioles	Na2S 10 µM	effect of Na2S on Ca2+ signals	H2S increased Ca-spark frequency, decreased [Ca2+ ]i levels	[3]
	ex vivo	confocal imaging	newborn piglet	endothelium-denuded cerebral arterioles	Na2S 10 µM	effect of Na2S on the regulation of [Ca2+]SR transients	H2S increased caffeine-induced [Ca2+ ]I transients; elevates [Ca2+]SR transients	[3]
	In vivo	cranial window	Wistar rats	pial arteries	NaHS 30 µM	Effect of NaHS on vascular tone given with SNP or glibenclamide	NaHS induced vasodilatation; NaHS and SNP produced greater vasodilatation together than alone; inhibition of NO production or glibenclamide decreased the vasodilator effect of NaHS	[11]
	in vivo	cranial window	Wistar rats	meningeal arteries	Na2S 300 µM	Effect of Na2S on the meningeal blood flow; examinations on the role of the CGRP pathway	Na2S caused rapid increase in the meningeal blood flow and in the CGRP release; CGRP receptor or TRPA1 channel antagonists abolished the effect, L-NMMA decreased the effect	[12]
	in vivo	cranial window	pig	pial arterioles	saturated H2S watery solution diluted in CSF to 10-6; 10-5; 10-4; 2x10-4; L-cysteine 1, 3, 5, 7 mM	topical application of H2S with either L-cysteine or glibenclamide on the cranial windows	H2S and L-cysteine dilated the arterioles in a concentration-dependent manner, glibenclamide blocked the effect; L-cysteine increased the H2S level in the CSF	[13]
	in vivo	tissue samples after middle cerebral occlusion	Wistar rats		L-cysteine 2.5-5-10 mmol/kg ip. or 0.25-1.0-2.5 given intracerebroventricular	Effect of L-cysteine on the outcome of stroke	L-cysteine dose-dependently increased the infarct volume by 30%	[14]
	in vivo	tissue samples after middle cerebral occlusion	Wistar rats		L-cysteine 10 mmol/kg ip. and AOAA 0.5 mmol/kg ip.	Effect of L-cysteine on the outcome of stroke	AOAA diminished the L-cys induced increase of post-stroke area	[14]
1.	Jang, H.; Oh, M.-Y.; Kim, Y.-J.; Choi, I.; Yang, H.S.; Ryu, W.-S.; Lee, S.H.; Yoon, B.-W. Hydrogen sulfide treatment induces angiogenesis after cerebral ischemia. J. Neurosci. Res. 2014, 92, 1520–1528, doi:10.1002/jnr.23427.
2.	Tian, X.Y.; Wong, W.T.; Sayed, N.; Luo, J.; Tsang, S.-Y.; Bian, Z.; Lu, Y.; Cheang, W.S.; Yao, X.; Chen, Z.-Y.; et al. NaHS relaxes rat cerebral artery in vitro via inhibition of l-type voltage-sensitive Ca2+ channel. Pharmacol. Res. 2012, 65, 239–246, doi:10.1016/j.phrs.2011.11.006.
3.	Liang, G.H.; Xi, Q.; Leffler, C.W.; Jaggar, J.H. Hydrogen sulfide activates Ca2+ sparks to induce cerebral arteriole dilatation. J. Physiol. 2012, 590, 2709–2720, doi:10.1113/jphysiol.2011.225128.
4.	Liang, G.H.; Adebiyi, A.; Leo, M.D.; McNally, E.M.; Leffler, C.W.; Jaggar, J.H. Hydrogen sulfide dilates cerebral arterioles by activating smooth muscle cell plasma membrane KATP channels. Am. J. Physiol. Circ. Physiol. 2011, 300, H2088–H2095, doi:10.1152/ajpheart.01290.2010.
5.	Emmez, H.; Borcek, A.; Gonul, I.I.; Belen, H.B.; Solaroglu, I.; Baykaner, M. The effect of hydrogen sulphide on experimental cerebral vasospasm. Turk. Neurosurg. 2015, 27, 374–379.
6.	Morikawa, T.; Kajimura, M.; Nakamura, T.; Hishiki, T.; Nakanishi, T.; Yukutake, Y.; Nagahata, Y.; Ishikawa, M.; Hattori, K.; Takenouchi, T.; et al. Hypoxic regulation of the cerebral microcirculation is mediated by a carbon monoxide-sensitive hydrogen sulfide pathway. Proc. Natl. Acad. Sci. 2012, 109, 1293–1298, doi:10.1073/pnas.1119658109.
7.	Li, S.; Ping, N.-N.; Cao, L.; Mi, Y.-N.; Cao, Y.-X. H2S induces vasoconstriction of rat cerebral arteries via cAMP/adenylyl cyclase pathway. Toxicol. Appl. Pharmacol. 2015, 289, 389–396, doi:10.1016/j.taap.2015.10.021.
8.	Wen, J.Y., et al., Role of CSE-Produced H2S on Cerebrovascular Relaxation via RhoA-ROCK Inhibition and Cerebral Ischemia-Reperfusion Injury in Mice. ACS Chem Neurosci, 2019. 10(3): p. 1565-1574.
9.	Streeter, E.Y.; Badoer, E.; Woodman, O.L.; Hart, J.L. Effect of type 1 diabetes on the production and vasoactivity of hydrogen sulfide in rat middle cerebral arteries. Physiol. Rep. 2013, 1, 00111, doi:10.1002/phy2.111.
10.	Streeter, E.; Hart, J.; Badoer, E. An investigation of the mechanisms of hydrogen sulfide-induced vasorelaxation in rat middle cerebral arteries. Naunyn-Schmiedeberg’s Arch. Pharmacol. 2012, 385, 991–1002, doi:10.1007/s00210-012-0779-2.
11.	Lobov, G.I.; Sokolova, I.B.; Gorshkova, O.P.; Shvetsova, M.E.; Dvoretskii, D.P. Contribution of Hydrogen Sulfide to Dilation of Rat Cerebral Arteries after Ischemia/Reperfusion Injury. Bull. Exp. Biol. Med. 2020, 168, 597–601, doi:10.1007/s10517-020-04759-z.
12.	Dux, M.; Will, C.; Vogler, B.; Filipovic, M.R.; Messlinger, K. Meningeal blood flow is controlled by H2 S-NO crosstalk activating a HNO-TRPA1-CGRP signalling pathway. Br. J. Pharmacol. 2015, 173, 431–445, doi:10.1111/bph.13164.
13.	Leffler, C.W.; Parfenova, H.; Basuroy, S.; Jaggar, J.H.; Umstot, E.S.; Fedinec, A.L. Hydrogen sulfide and cerebral microvascular tone in newborn pigs. Am. J. Physiol. Circ. Physiol. 2011, 300, H440–H447, doi:10.1152/ajpheart.00722.2010.
14.	Wong, P.T.H.; Qu, K.; Chimon, G.N.; Seah, A.B.H.; Chang, H.M.; Wong, M.C.; Ng, Y.K.; Rumpel, H.; Halliwell, B.; Chen, C.P.L.H. High Plasma Cyst(e)ine Level May Indicate Poor Clinical Outcome in Patients With Acute Stroke: Possible Involvement of Hydrogen Sulfide. J. Neuropathol. Exp. Neurol. 2006, 65, 109–115, doi:10.1097/01.jnen.0000199571.96472.c7.

## Sheet: H2S INHIBITORS
	Study type	Method	Animal	Vessel or cell type	H2S inhibitor, concentration and administration	Examination or study setup	Outcome	Ref
	ex vivo	wire myograph	Sprague-Dawley rat	middle cerebral artery	L-cysteine 0.1-10 mM/l and PAG 1 mM/l or AOAA 1mM/l	effect of L-cysteine alone and with PAG or AOAA on the vascular tone	PAG inhibited the L-cysteine induced vasorelaxation, but AOAA had no effect	[1]
	ex vivo	wire myograph	Sprague-Dawley rats (WT and STZ-induced diabetic)	middle cerebral artery	L-cysteine (10 uM/L-100 mmol/L), and PAG 20 mmol/l	examination of vascular tone after L-cyteine and PAG treatment	The effect of L-cysteine was attenuated by PAG both in the diabetic and control group	[2]
	In vivo	Carotid ligation	Wistar rats	pial arteries	PAG 30 mM	Effect of PAG on the Ach-induced vasodilation	PAG did not decrease Ach-induced vasodilation in the large vessels, just in the small pial arteries; after ischemia, the effect of PAG remained	[3]
	in vivo	cranial window	Wistar rats	meningeal arteries	oxamic acid (H2S inhibitor) 2 mM	Effect of oxamic acid on the NO mediated vasodilation	Oxamic acid reduced the blood flow increase evoked by the NO donor DEANONOate	[4]
	in vivo	cranial window	pig	pial arterioles	PAG 10 mM; AOAA 1mM	topical application of L-cysteine followed by PAG or AOAA on the cranial windows	hypercapnia increased the H2S level in the CSF given before but not during PAG treatment. AOA had no effect.	[5]
1.	Tian, X.Y.; Wong, W.T.; Sayed, N.; Luo, J.; Tsang, S.-Y.; Bian, Z.; Lu, Y.; Cheang, W.S.; Yao, X.; Chen, Z.-Y.; et al. NaHS relaxes rat cerebral artery in vitro via inhibition of l-type voltage-sensitive Ca2+ channel. Pharmacol. Res. 2012, 65, 239–246, doi:10.1016/j.phrs.2011.11.006.
2.	Streeter, E.Y.; Badoer, E.; Woodman, O.L.; Hart, J.L. Effect of type 1 diabetes on the production and vasoactivity of hydrogen sulfide in rat middle cerebral arteries. Physiol. Rep. 2013, 1, 00111, doi:10.1002/phy2.111.
3.	Lobov, G.I.; Sokolova, I.B.; Gorshkova, O.P.; Shvetsova, M.E.; Dvoretskii, D.P. Contribution of Hydrogen Sulfide to Dilation of Rat Cerebral Arteries after Ischemia/Reperfusion Injury. Bull. Exp. Biol. Med. 2020, 168, 597–601, doi:10.1007/s10517-020-04759-z.
4.	Dux, M.; Will, C.; Vogler, B.; Filipovic, M.R.; Messlinger, K. Meningeal blood flow is controlled by H2 S-NO crosstalk activating a HNO-TRPA1-CGRP signalling pathway. Br. J. Pharmacol. 2015, 173, 431–445, doi:10.1111/bph.13164.
5.	Leffler, C.W.; Parfenova, H.; Basuroy, S.; Jaggar, J.H.; Umstot, E.S.; Fedinec, A.L. Hydrogen sulfide and cerebral microvascular tone in newborn pigs. Am. J. Physiol. Circ. Physiol. 2011, 300, H440–H447, doi:10.1152/ajpheart.00722.2010.

## Sheet: OTHER STUDIES
	Study type	Method	Animal	Vessel or cell type	Treatment	Examination or study setup	Outcome	Ref
	ex vivo	neonatal cerebellar slices	mouse (WT, HO2-null and CBS-null)	vermis arterioles	-	hypoxia	hypoxia elicited vasodilatation, the effect was decreased both in HO-2-null and CBS-null mice	[1]
	ex vivo	wire myograph	WT and CSE -/- mice	basilar arteries	RhoA agonist LPA and U46619	Effect of RhoA agonist LPA and U46619	LPA and U46619 induced constriction, which was more pronounced in CSE -/- mice	[2]
	ex vivo	wire myograph	WT and CSE -/- mice	basilar arteries	Rho-associated protein kinase (ROCK) inhibitor Y27632	Effect of Y27632 on CSE -/-mice	CSE -/-decreased Y27632-induced relaxation	[2]
	in vivo	two-photon intravital laser scanning microscopy	mouse (WT, HO2-null and CBS-null)	cortical precapillary arterioles	-	hypoxia with 10% O2	hypoxia elicited vasodilatation, which was decreased in HO-2-null and attenuated in CBS-null mice	[1]
	in vivo	cranial window	pig	pial arterioles		hypercapnia with 10% CO2 for 5 min	CSF H2S concentration increased	[3]
	In vivo	cranial window	pig	Pial arterioles		Effect of low (10-12-10-11) or high dose (10-8) endothelin-1 , given with glibenclamide (KATP inhibitor) and paxilline (BK Ca2+ inhibitor)	Low level of ET-1 induced vasodilation, which was attenuated after glibenclamide and paxilline. High level of ET-1 induced vasoconstriction, unaffected by glibenclamide or paxilline	[4]
	in vivo	post-stroke patients	human			Linkage between serum cysteine levels and the outcome of stroke	positive correlation between increased serum cysteine levels and poor clinical outcome	[5]
1.	Morikawa, T.; Kajimura, M.; Nakamura, T.; Hishiki, T.; Nakanishi, T.; Yukutake, Y.; Nagahata, Y.; Ishikawa, M.; Hattori, K.; Takenouchi, T.; et al. Hypoxic regulation of the cerebral microcirculation is mediated by a carbon monoxide-sensitive hydrogen sulfide pathway. Proc. Natl. Acad. Sci. 2012, 109, 1293–1298, doi:10.1073/pnas.1119658109.
2.	Wen, J.Y., et al., Role of CSE-Produced H2S on Cerebrovascular Relaxation via RhoA-ROCK Inhibition and Cerebral Ischemia-Reperfusion Injury in Mice. ACS Chem Neurosci, 2019. 10(3): p. 1565-1574.
3.	Leffler, C.W.; Parfenova, H.; Basuroy, S.; Jaggar, J.H.; Umstot, E.S.; Fedinec, A.L. Hydrogen sulfide and cerebral microvascular tone in newborn pigs. Am. J. Physiol. Circ. Physiol. 2011, 300, H440–H447, doi:10.1152/ajpheart.00722.2010.
4.	Patel, S.; Fedinec, A.L.; Liu, J.; Weiss, M.A.; Pourcyrous, M.; Harsono, M.; Parfenova, H.; Leffler, C.W. H2S mediates the vasodilator effect of endothelin-1 in the cerebral circulation. Am. J. Physiol. Circ. Physiol. 2018, 315, H1759–H1764, doi:10.1152/ajpheart.00451.2018.
5.	Wong, P.T.H.; Qu, K.; Chimon, G.N.; Seah, A.B.H.; Chang, H.M.; Wong, M.C.; Ng, Y.K.; Rumpel, H.; Halliwell, B.; Chen, C.P.L.H. High Plasma Cyst(e)ine Level May Indicate Poor Clinical Outcome in Patients With Acute Stroke: Possible Involvement of Hydrogen Sulfide. J. Neuropathol. Exp. Neurol. 2006, 65, 109–115, doi:10.1097/01.jnen.0000199571.96472.c7.
